# Supplementary material for: Risk and symptoms of COVID-19 in health professionals according to baseline immune status and booster vaccination during the Delta and Omicron waves in Switzerland—A multicentre cohort study
Source: PLOS journal article supplement (doi:10.1371/journal.pmed.1004125), 2022-11-07
Supplement: S5 (10.1371/journal.pmed.1004125.s005) [file journal.pmed.1004125.s005]

**Table S3.** Sensitivity analyses: Comparison of adjusted hazard ratios obtained in Cox models with missing value imputation (pooled results from ten imputations, as presented in Table 2 of main document), without missing value imputation (i.e. complete case analysis), and with exclusion of events occurring during the period of variant overlap between 6 December 2021 and 3 January 2022.

|                                        | Original result<br>(Table 2) | No missing value<br>imputation | Without variant<br>overlap |
|----------------------------------------|------------------------------|--------------------------------|----------------------------|
| <b>Delta period</b>                    |                              |                                |                            |
| Group V (vs. N)                        | 0.47                         | 0.45                           | 0.45                       |
| Group I (vs. N)                        | 0.26                         | 0.22                           | 0.24                       |
| Group H (vs. N)                        | 0.06                         | 0.06                           | 0.06                       |
| Age (per decade)                       | 0.97                         | 0.93                           | 1.01                       |
| Male vs. female                        | 1.16                         | 1.14                           | 1.27                       |
| Body mass index > 30 kg/m <sup>2</sup> | 0.84                         | 0.89                           | 0.82                       |
| Patient contact                        | 0.77                         | 0.79                           | 0.73                       |
| Respirator mask use                    | 0.99                         | 0.98                           | 1.04                       |
| Positive household                     | 9.66                         | 9.92                           | 8.92                       |
| Negative test in last month            | 1.26                         | 1.19                           | 1.18                       |
| Booster                                | 0.42                         | 0.43                           | 0.38                       |
| <b>Omicron period</b>                  |                              |                                |                            |
| Group V (vs. N)                        | 0.85                         | 0.84                           | 0.90                       |
| Group I (vs. N)                        | 0.74                         | 0.73                           | 0.83                       |
| Group H (vs. N)                        | 0.52                         | 0.50                           | 0.57                       |
| Age (per decade)                       | 0.79                         | 0.79                           | 0.79                       |
| Male vs. female                        | 0.87                         | 0.88                           | 0.85                       |
| Body mass index > 30 kg/m <sup>2</sup> | 1.02                         | 1.02                           | 1.04                       |
| Patient contact                        | 0.89                         | 0.87                           | 0.89                       |
| Respirator mask use                    | 1.09                         | 1.11                           | 1.08                       |
| Positive household                     | 6.17                         | 6.16                           | 6.20                       |
| Negative test in last month            | 1.11                         | 1.13                           | 1.10                       |
| Booster                                | 0.81                         | 0.82                           | 0.83                       |

N (no immunity): No reported infection and anti-N/-S negative and no previous SARS-CoV-2 vaccination; V (vaccinated): no reported infection and anti-N negative, but twice vaccinated; I (infected): infection reported or anti-N positive (at any time), but no vaccination; H (hybrid immunity): reported infection or anti-N positive (at any time) and vaccination (≥1 dose).
