# Supplementary material for: Risk and symptoms of COVID-19 in health professionals according to baseline immune status and booster vaccination during the Delta and Omicron waves in Switzerland—A multicentre cohort study
Source: PLOS journal article supplement (doi:10.1371/journal.pmed.1004125), 2022-11-07
Supplement: S10 (10.1371/journal.pmed.1004125.s010) [file journal.pmed.1004125.s010]

**Table S8.** Rate ratio (RR) and 95% confidence intervals (CI) from multivariable Poisson regression regarding number of symptoms reported from SARS-CoV-2 infections during the Omicron period. Model includes effect of booster and is therefore restricted to groups V and H.

|                                        | Rate ratio, i.e. relative number<br>(RR and 95% CI) | <i>p-value</i> |
|----------------------------------------|-----------------------------------------------------|----------------|
| Group H vs. V                          | 0.80 (0.71–0.91)                                    | <0.001         |
| Age (per decade)                       | 0.96 (0.92–1.00)                                    | 0.074          |
| Male vs. female                        | 0.93 (0.83–1.05)                                    | 0.268          |
| Body mass index > 30 kg/m <sup>2</sup> | 1.03 (0.90–1.18)                                    | 0.696          |
| Comorbidity at baseline                | 1.17 (1.06–1.28)                                    | 0.001          |
| Respirator mask use                    | 1.04 (0.92–1.17)                                    | 0.547          |
| Time of (re)-infection (per month)     | 1.22 (1.13–1.31)                                    | <0.001         |
| Booster vaccination                    | 0.79 (0.71–0.88)                                    | <0.001         |

V (vaccinated): no reported infection and anti-N negative, but twice vaccinated; H (hybrid immunity): reported infection or anti-N positive (at any time) and vaccination (≥1 dose). BMI, Body Mass Index
